# Supplementary material for: Prediction of The Mechanical Behavior of Polylactic Acid Parts with Shape Memory Effect Fabricated by FDM
Source: MDPI journal article supplement (doi:10.3390/polym15051162), 2023-02-25
Supplement: s1 [file s1]

## Prediction of the Mechanical Behavior of Polylactic Acid Parts with Shape Memory Effect Fabricated by FDM

Zhamila Issabaeva and Igor Shishkovsky\*

Center for Materials Technologies, Skolkovo Institute of Science and Technology, 121205 Moscow, Russia

\* Correspondence: i.shishkovsky@skoltech.ru; Tel.: +7-495-2801481

**Table S1** All printing regimes.

| №  | D of the Nozzle, mm | Layer Height, mm | Infill Pattern | Infill Density, % | Temperature, °C |
|----|---------------------|------------------|----------------|-------------------|-----------------|
| 1  | 0.50                | 0.2              | Grid           | 20                | 240             |
| 2  | 0.50                | 0.2              | Grid           | 25                | 240             |
| 3  | 0.50                | 0.2              | Grid           | 50                | 240             |
| 4  | 0.50                | 0.2              | Grid           | 70                | 240             |
| 5  | 0.50                | 0.2              | Grid           | 80                | 240             |
| 6  | 0.50                | 0.2              | Line           | 20                | 240             |
| 7  | 0.50                | 0.2              | Line           | 25                | 240             |
| 8  | 0.50                | 0.2              | Line           | 50                | 240             |
| 9  | 0.50                | 0.2              | Line           | 70                | 240             |
| 10 | 0.50                | 0.2              | Line           | 80                | 240             |
| 11 | 0.50                | 0.2              | Gyroid         | 20                | 240             |
| 12 | 0.50                | 0.2              | Gyroid         | 25                | 240             |
| 13 | 0.50                | 0.2              | Gyroid         | 50                | 240             |
| 14 | 0.50                | 0.2              | Gyroid         | 70                | 240             |
| 15 | 0.50                | 0.2              | Gyroid         | 80                | 240             |
| 16 | 0.50                | 0.3              | Grid           | 20                | 240             |
| 17 | 0.50                | 0.3              | Grid           | 25                | 240             |
| 18 | 0.50                | 0.3              | Grid           | 50                | 240             |
| 19 | 0.50                | 0.3              | Grid           | 70                | 240             |
| 20 | 0.50                | 0.3              | Grid           | 80                | 240             |
| 21 | 0.50                | 0.3              | Line           | 20                | 240             |
| 22 | 0.50                | 0.3              | Line           | 25                | 240             |
| 23 | 0.50                | 0.3              | Line           | 50                | 240             |
| 24 | 0.50                | 0.3              | Line           | 70                | 240             |
| 25 | 0.50                | 0.3              | Line           | 80                | 240             |
| 26 | 0.50                | 0.3              | Gyroid         | 20                | 240             |
| 27 | 0.50                | 0.3              | Gyroid         | 25                | 240             |
| 28 | 0.50                | 0.3              | Gyroid         | 50                | 240             |
| 29 | 0.50                | 0.3              | Gyroid         | 70                | 240             |
| 30 | 0.50                | 0.3              | Gyroid         | 80                | 240             |
| 31 | 0.50                | 0.2              | Grid           | 20                | 210             |
| 32 | 0.50                | 0.2              | Grid           | 25                | 210             |

|    |      |     |        |    |     |
|----|------|-----|--------|----|-----|
| 33 | 0.50 | 0.2 | Grid   | 50 | 210 |
| 34 | 0.50 | 0.2 | Grid   | 70 | 210 |
| 35 | 0.50 | 0.2 | Grid   | 80 | 210 |
| 36 | 0.50 | 0.2 | Line   | 20 | 210 |
| 37 | 0.50 | 0.2 | Line   | 25 | 210 |
| 38 | 0.50 | 0.2 | Line   | 50 | 210 |
| 39 | 0.50 | 0.2 | Line   | 70 | 210 |
| 40 | 0.50 | 0.2 | Line   | 80 | 210 |
| 41 | 0.50 | 0.2 | Gyroid | 20 | 210 |
| 42 | 0.50 | 0.2 | Gyroid | 25 | 210 |
| 43 | 0.50 | 0.2 | Gyroid | 50 | 210 |
| 44 | 0.50 | 0.2 | Gyroid | 70 | 210 |
| 45 | 0.50 | 0.2 | Gyroid | 80 | 210 |
| 46 | 0.50 | 0.3 | Grid   | 20 | 210 |
| 47 | 0.50 | 0.3 | Grid   | 25 | 210 |
| 48 | 0.50 | 0.3 | Grid   | 50 | 210 |
| 49 | 0.50 | 0.3 | Grid   | 70 | 210 |
| 50 | 0.50 | 0.3 | Grid   | 80 | 210 |
| 51 | 0.50 | 0.3 | Line   | 20 | 210 |
| 52 | 0.50 | 0.3 | Line   | 25 | 210 |
| 53 | 0.50 | 0.3 | Line   | 50 | 210 |
| 54 | 0.50 | 0.3 | Line   | 70 | 210 |
| 55 | 0.50 | 0.3 | Line   | 80 | 210 |
| 56 | 0.50 | 0.3 | Gyroid | 20 | 210 |
| 57 | 0.50 | 0.3 | Gyroid | 25 | 210 |
| 58 | 0.50 | 0.3 | Gyroid | 50 | 210 |
| 59 | 0.50 | 0.3 | Gyroid | 70 | 210 |
| 60 | 0.50 | 0.3 | Gyroid | 80 | 210 |
| 61 | 0.30 | 0.2 | Grid   | 20 | 240 |
| 62 | 0.30 | 0.2 | Grid   | 25 | 240 |
| 63 | 0.30 | 0.2 | Grid   | 50 | 240 |
| 64 | 0.30 | 0.2 | Grid   | 70 | 240 |
| 65 | 0.30 | 0.2 | Grid   | 80 | 240 |
| 66 | 0.30 | 0.2 | Line   | 20 | 240 |
| 67 | 0.30 | 0.2 | Line   | 25 | 240 |
| 68 | 0.30 | 0.2 | Line   | 50 | 240 |
| 69 | 0.30 | 0.2 | Line   | 70 | 240 |
| 70 | 0.30 | 0.2 | Line   | 80 | 240 |
| 71 | 0.30 | 0.2 | Gyroid | 20 | 240 |
| 72 | 0.30 | 0.2 | Gyroid | 25 | 240 |
| 73 | 0.30 | 0.2 | Gyroid | 50 | 240 |
| 74 | 0.30 | 0.2 | Gyroid | 70 | 240 |
| 75 | 0.30 | 0.2 | Gyroid | 80 | 240 |

|     |      |     |        |    |     |
|-----|------|-----|--------|----|-----|
| 76  | 0.30 | 0.3 | Grid   | 20 | 240 |
| 77  | 0.30 | 0.3 | Grid   | 25 | 240 |
| 78  | 0.30 | 0.3 | Grid   | 50 | 240 |
| 79  | 0.30 | 0.3 | Grid   | 70 | 240 |
| 80  | 0.30 | 0.3 | Grid   | 80 | 240 |
| 81  | 0.30 | 0.3 | Line   | 20 | 240 |
| 82  | 0.30 | 0.3 | Line   | 25 | 240 |
| 83  | 0.30 | 0.3 | Line   | 50 | 240 |
| 84  | 0.30 | 0.3 | Line   | 70 | 240 |
| 85  | 0.30 | 0.3 | Line   | 80 | 240 |
| 86  | 0.30 | 0.3 | Gyroid | 20 | 240 |
| 87  | 0.30 | 0.3 | Gyroid | 25 | 240 |
| 88  | 0.30 | 0.3 | Gyroid | 50 | 240 |
| 89  | 0.30 | 0.3 | Gyroid | 70 | 240 |
| 90  | 0.30 | 0.3 | Gyroid | 80 | 240 |
| 91  | 0.30 | 0.2 | Grid   | 20 | 210 |
| 92  | 0.30 | 0.2 | Grid   | 25 | 210 |
| 93  | 0.30 | 0.2 | Grid   | 50 | 210 |
| 94  | 0.30 | 0.2 | Grid   | 70 | 210 |
| 95  | 0.30 | 0.2 | Grid   | 80 | 210 |
| 96  | 0.30 | 0.2 | Line   | 20 | 210 |
| 97  | 0.30 | 0.2 | Line   | 25 | 210 |
| 98  | 0.30 | 0.2 | Line   | 50 | 210 |
| 99  | 0.30 | 0.2 | Line   | 70 | 210 |
| 100 | 0.30 | 0.2 | Line   | 80 | 210 |
| 101 | 0.30 | 0.2 | Gyroid | 20 | 210 |
| 102 | 0.30 | 0.2 | Gyroid | 25 | 210 |
| 103 | 0.30 | 0.2 | Gyroid | 50 | 210 |
| 104 | 0.30 | 0.2 | Gyroid | 70 | 210 |
| 105 | 0.30 | 0.2 | Gyroid | 80 | 210 |
| 106 | 0.30 | 0.3 | Grid   | 20 | 210 |
| 107 | 0.30 | 0.3 | Grid   | 25 | 210 |
| 108 | 0.30 | 0.3 | Grid   | 50 | 210 |
| 109 | 0.30 | 0.3 | Grid   | 70 | 210 |
| 110 | 0.30 | 0.3 | Grid   | 80 | 210 |
| 111 | 0.30 | 0.3 | Line   | 20 | 210 |
| 112 | 0.30 | 0.3 | Line   | 25 | 210 |
| 113 | 0.30 | 0.3 | Line   | 50 | 210 |
| 114 | 0.30 | 0.3 | Line   | 70 | 210 |
| 115 | 0.30 | 0.3 | Line   | 80 | 210 |
| 116 | 0.30 | 0.3 | Gyroid | 20 | 210 |
| 117 | 0.30 | 0.3 | Gyroid | 25 | 210 |
| 118 | 0.30 | 0.3 | Gyroid | 50 | 210 |

|     |      |     |        |    |     |
|-----|------|-----|--------|----|-----|
| 119 | 0.30 | 0.3 | Gyroid | 70 | 210 |
| 120 | 0.30 | 0.3 | Gyroid | 80 | 210 |

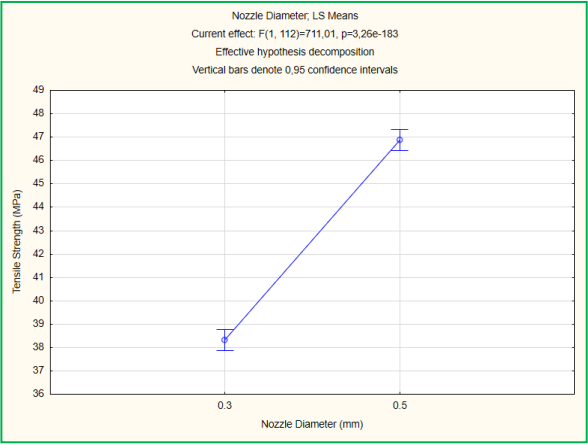

(a)

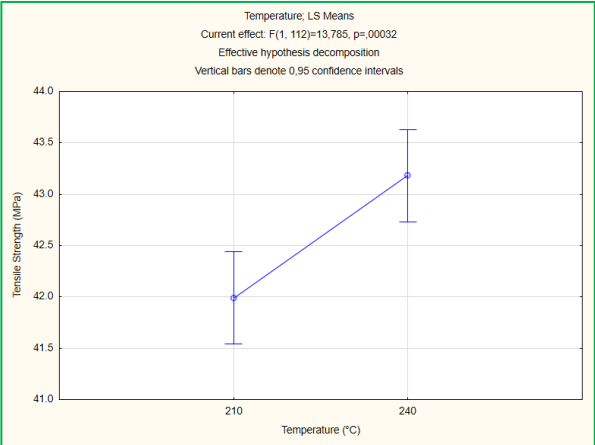

(b)

**Figure S1.** The effects of a single parameter on strength: (a) the effect of nozzle diameter; (b) the effect of extrusion temperature.

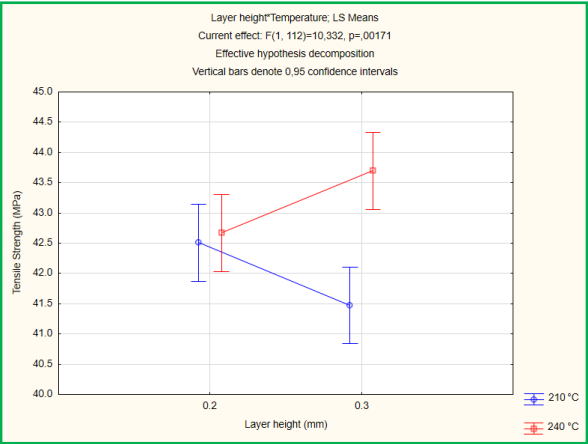

(a)

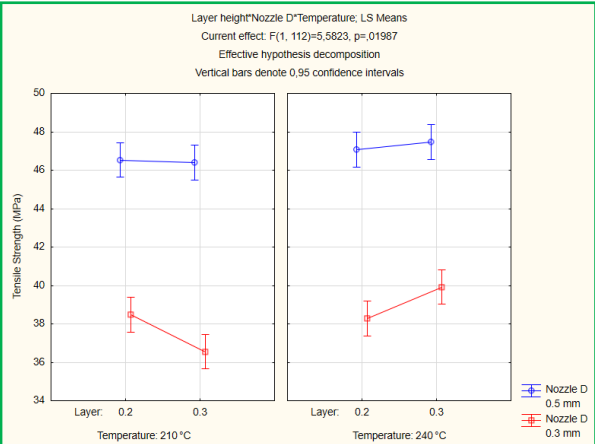

(b)

**Figure S2.** The combined influence of two and three factors: (a) extrusion temperature and layer height; (b) extrusion temperature, nozzle diameter and layer height.
